# Supplementary material
Source: Springer Nature journal article supplement (https://www.springermedizin.de/resource/supplementary/12967_2005_97_MOESM5_ESM.pdf/9575686)

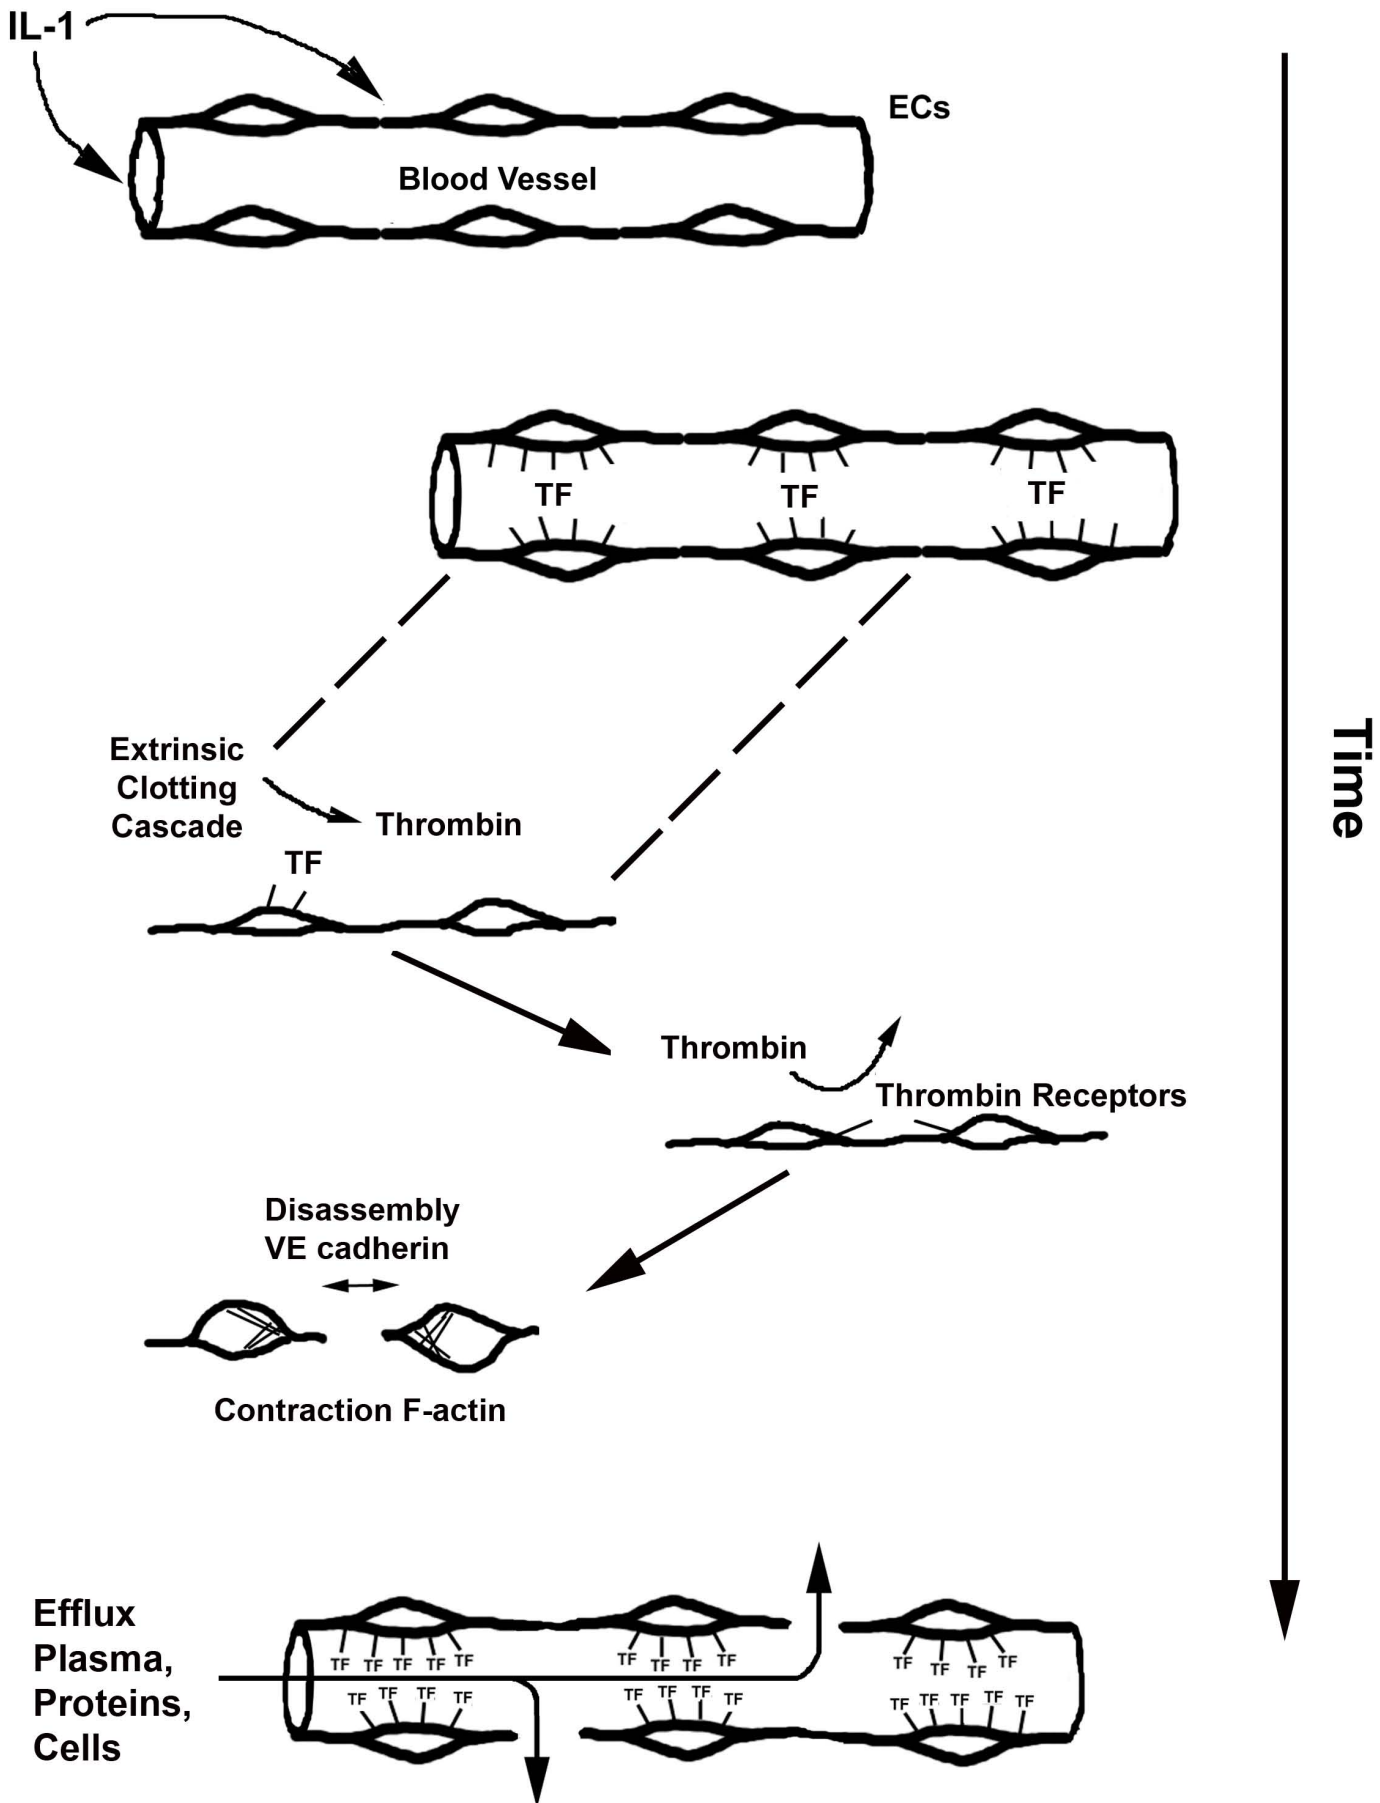

Supplement: MOESM5 [file 9575686]
